# Supplementary material for: Flexoelectricity-enhanced photovoltaic effect in flexible LiNbO3 nanorod array/PVDF nanocomposites
Source: Royal Society of Chemistry journal article supplement (doi:10.1039/d4ta06905f), 2024-12-30
Supplement: d4ta06905f1.pdf [file d4ta06905f1.pdf]

**Flexoelectricity-enhanced photovoltaic effect in Flexible LiNbO<sub>3</sub> nanorod array/PVDF nanocomposites**

**Xin Zheng<sup>a,b</sup>, Dan Tan<sup>d</sup>, Weidong Wang<sup>b,c</sup>, Xiaodan Cao<sup>a,b</sup>, Morten Willatzen<sup>b</sup>, Zhonglin Wang<sup>b</sup> and Kailiang Ren<sup>a,b,c,\*</sup>**

<sup>a</sup>Center on Nanoenergy Research, Institute of Science and Technology for Carbon Peak & Neutrality, Key Laboratory of Blue Energy and Systems Integration (Guangxi University), Education Department of Guangxi Zhuang Autonomous Region, School of Physical Science & Technology, Guangxi University, Nanning 530004, PR China

<sup>b</sup> Beijing Key Laboratory of Micro-Nano Energy and Sensors, Beijing Institute of Nanoenergy and Nanosystems, Chinese Academy of Sciences, Beijing 101400, PR China

<sup>c</sup> School of Nanoscience and Engineering, University of Chinese Academy of Sciences, Beijing 100049, PR China

<sup>d</sup> School of Advanced Materials and Nanotechnology, Xidian University, Xi'an, China

Corresponding email: renkailiang@binn.cas.cn;

### Curvature calculation:

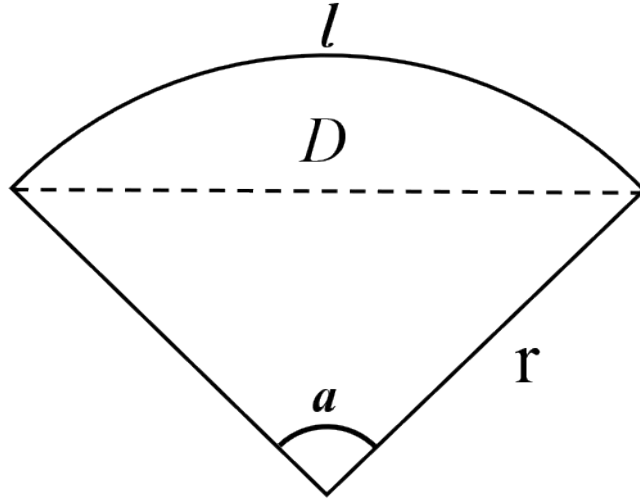

A schematic of the curvature calculation method for the bending film is shown above, where the arc length is defined as  $l$ ; the chord length is defined as  $D$ ; the radius of curvature is defined as  $r$ ; the central angle is defined as  $\alpha$ . In this investigation, the chord length was measured by the initial and final position of the sliding platform, respectively. Then, the calculation process of curvature ( $k$ ) in the bending process was calculated as below:

$$2r\sin\frac{\alpha}{2} = D \quad (Eq.S1)$$

According to the above equations, the central angle ( $\alpha$ ), radius of curvature ( $r$ ) and curvature ( $k=1/r$ ) was calculated as below.

$$r\alpha = l \quad (Eq.S2)$$

### Bandgap Calculation

The linear relationship between  $(\alpha hv)^2$  and  $hv$  is defined using the Tauc formula as below

$$(\alpha hv)^2 = A(hv - E_g) \quad (Eq.S3)$$

where  $\alpha$ ,  $hv$ ,  $A$  and  $E_g$  is the absorption coefficient, photon energy, a constant and the value of band gap. The calculated band gap of the LN-NR/PVDF-91 nanocomposite is 2.98 eV based on the UV-vis-NIR spectra of the sample.

**Table S1.** Parameters of the LN-NR/PVDF-91 nanocomposites used in this investigation, including central angle ( $a$ ), radius of curvature ( $r$ ) and curvature ( $k=1/r$ ).

| Radius (cm) | The sample length (cm) | Film thickness ( $\mu\text{m}$ ) | The central angle $a(^{\circ})$ | $k(1/\text{m})$ |
|-------------|------------------------|----------------------------------|---------------------------------|-----------------|
| 5           | 2                      | 60                               | 22.92                           | 20              |
| 6           | 2                      | 60                               | 19.08                           | 16.67           |
| 7           | 2                      | 60                               | 16.37                           | 14.29           |
| 8           | 2                      | 60                               | 14.32                           | 12.5            |

Figure S1. SEM images of LN nanosheets (LN-NS) at different scales.

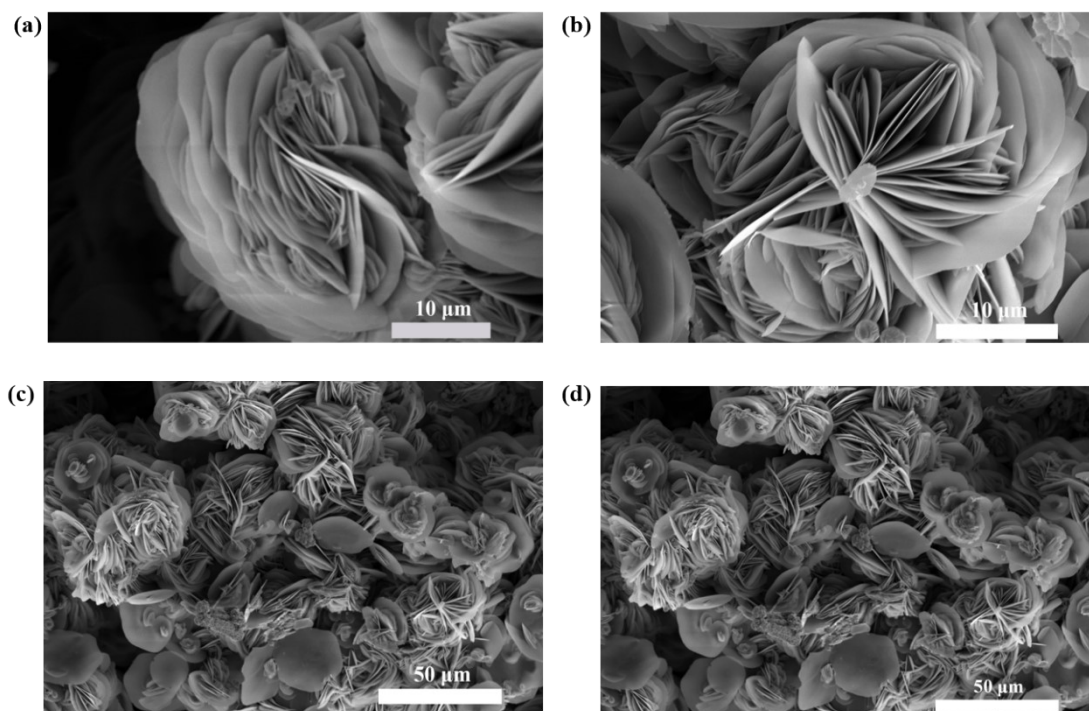

**Figure S2.** (a) Phase and strain amplitude hysteresis loop vs. applied voltage of the  $\text{LiNbO}_3$  nanorod (LN-NR) arrays before mixing with the PVDF solution, which was measured using piezoresponse force microscopy (PFM) before they were mixed with PVDF solution.

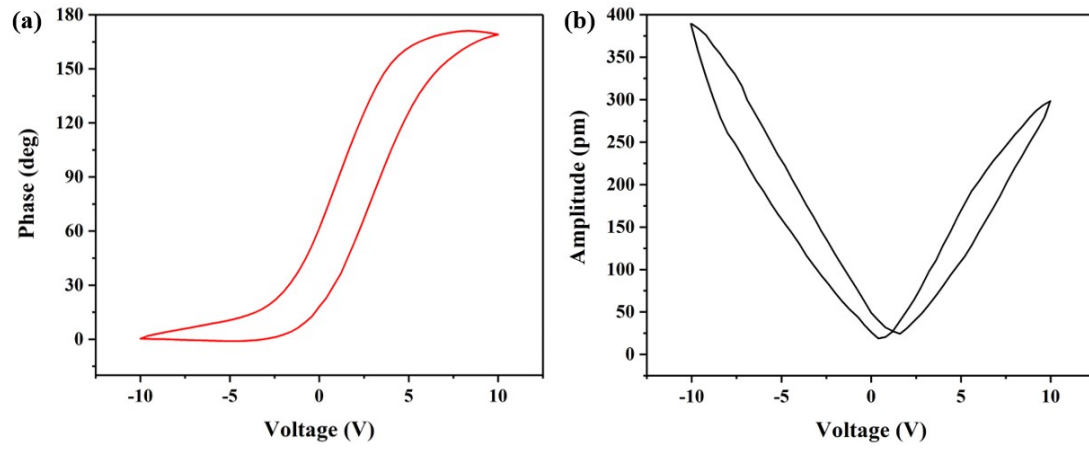

**Figure S3.** Thermogravimetric analysis (TGA) curves of the LN-NR/PVDF nanocomposites with different  $\text{LiNbO}_3$  concentrations (heating rate:  $10\text{ }^\circ\text{C}/\text{min}$ ), including 91%, 67% and 36%.

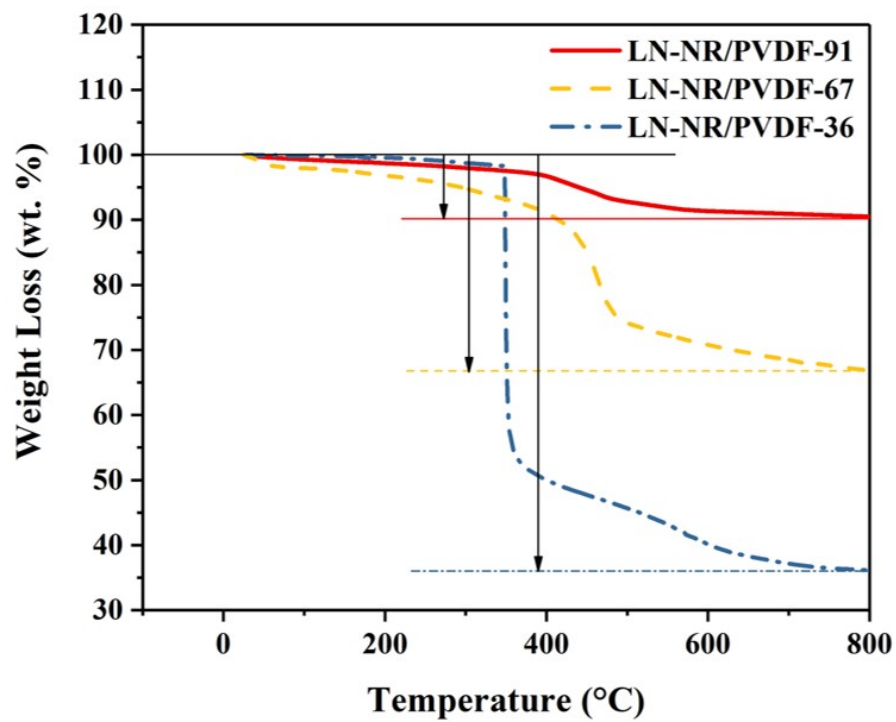

**Figure S4.** Ultraviolet-Visible-Near Infrared (UV-VIS-NIR) absorption spectra of (a) pristine PVDF film, (c) LN-NR/PVDF-36, (e) LN-NR/PVDF-67, (g) LN-NR/PVDF-91 nanocomposites; the calculated  $(\alpha h\nu)^2$  using Tauc Formula for (b) pristine PVDF film, (d) LN-NR/PVDF-36, (f) LN-NR/PVDF-67, (h) LN-NR/PVDF-91 nanocomposites.

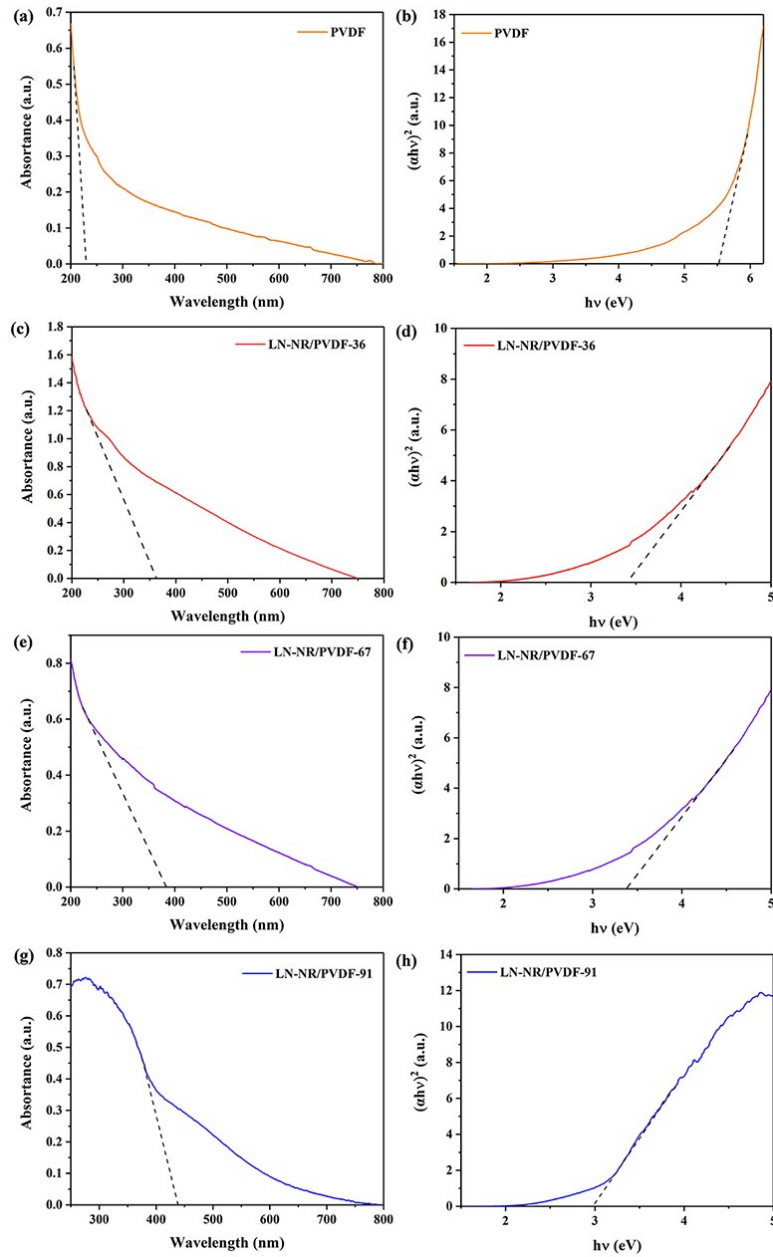

**Figure S5.** Polarization direction dependence of the PV current ( $I_{pv}$ ) of the LN-NR/PVDF -91 nanocomposite at a curvature of 1/4, which was measured using a laser (360 nm, 20 mW) with a linear polarizer.

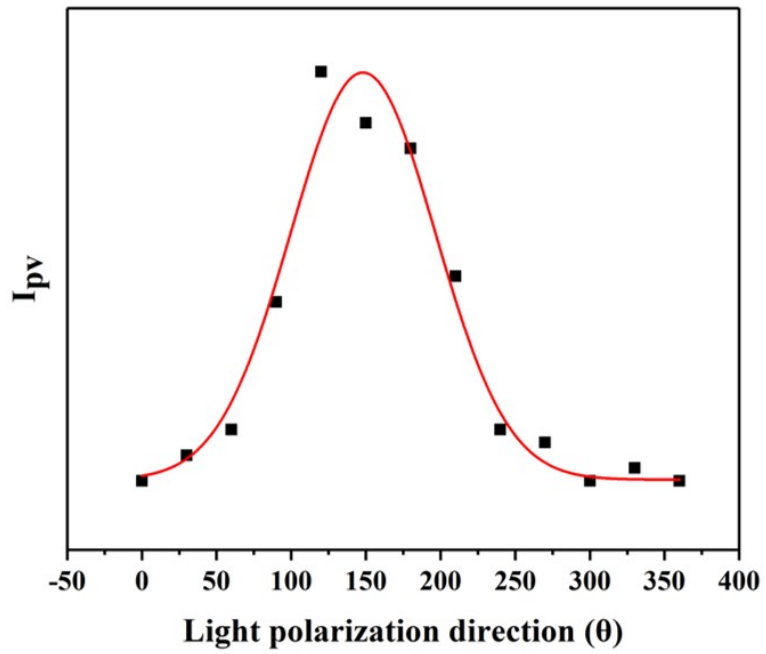



**Figure S6.** Photovoltaic current ( $I_{pv}$ ) as a function of curvature (downward bending) of (a) LN-NS/PVDF-67 (LN-nanosheet/PVDF) and (b) LN-NP/PVDF-67 (LN-nanoparticle/PVDF), and  $I_{pv}$  as a function of curvature (upward bending) of (c) LN-NS/PVDF-67 and (d) LN-NP/PVDF-67.

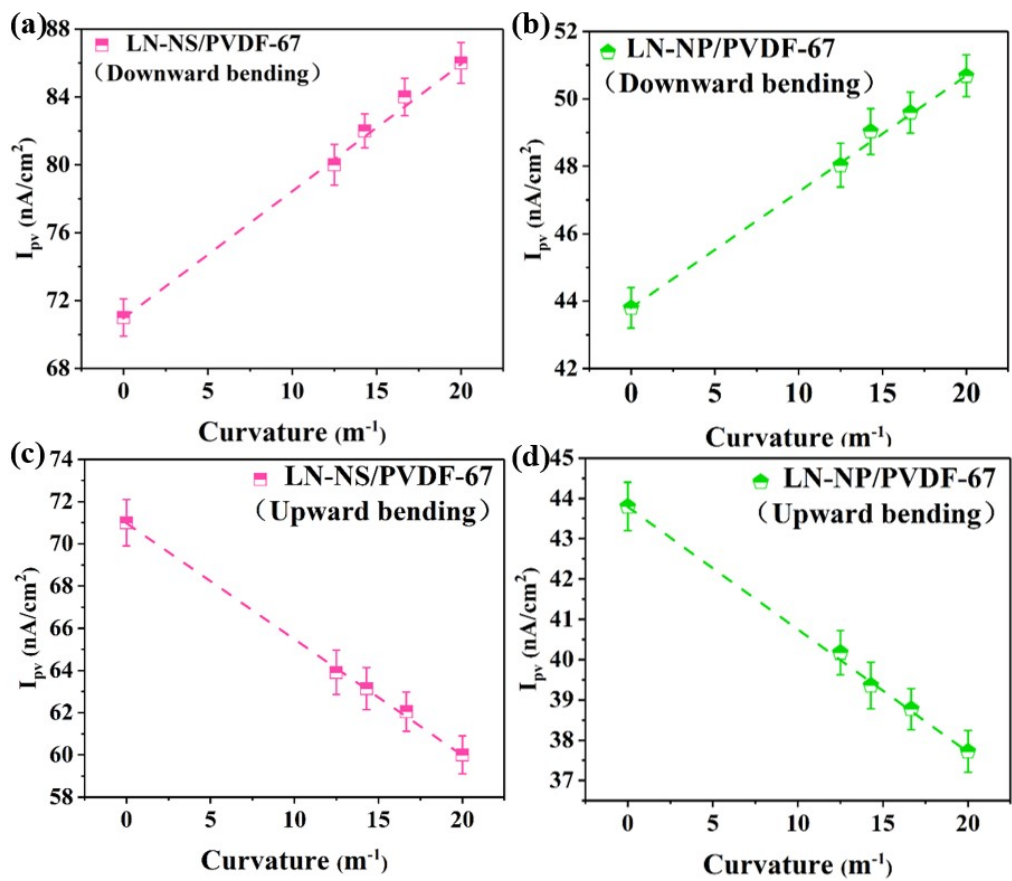

**Figure S7.** Dielectric constant and dielectric loss of (a) pristine PVDF, (b) LN-NR/PVDF-36, (c) LN-NP/PVDF-67, (d) LN-NS/PVDF-67, (e) LN-NR/PVDF-67, and LN-NR/PVDF-91 nanocomposites.

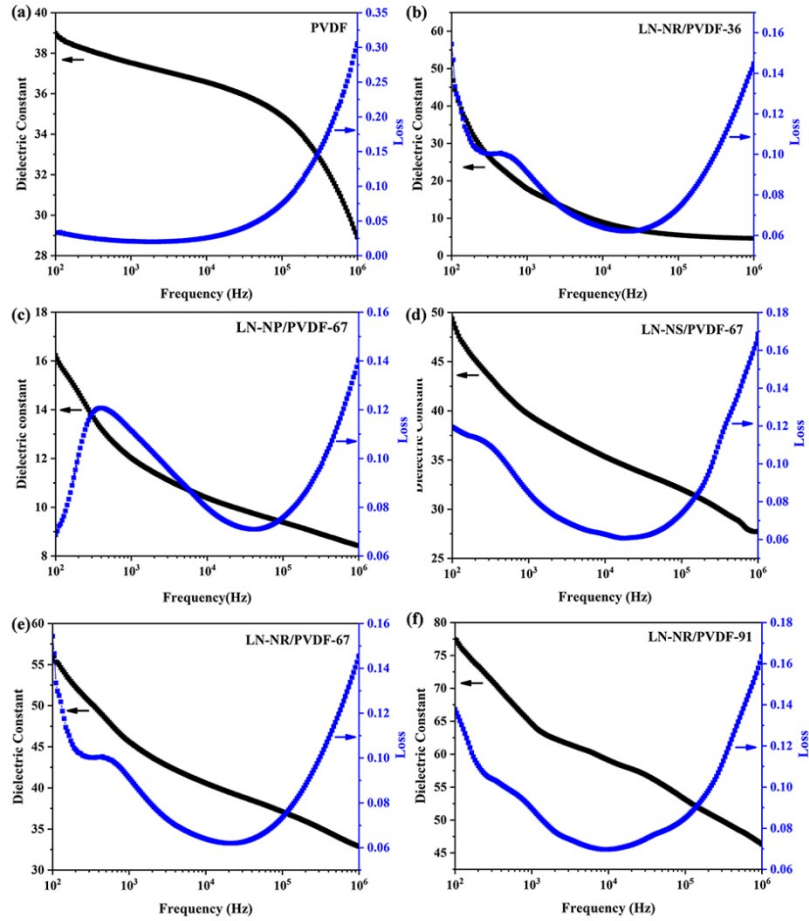

**Table S2.** Parameters used to calculate the flexoelectric coefficients of the pristine PVDF, LN-NS/PVDF-67, LN-NR/PVDF-36, LN-NR/PVDF-67 and LN-NR/PVDF-91 nanocomposites, including the distance  $x$  from the testing point of the tip displacement to the clamped end of the sample, the length (L) and width of the sample, and the vibration frequency.

| Sample        | $x(\text{cm})$ | $L(\text{cm})$ | $b(\text{cm})$ | $f(\text{Hz})$ |
|---------------|----------------|----------------|----------------|----------------|
| PVDF          | 1.61           | 1.51           | 1.52           | 4              |
| LN-NS/PVDF-67 | 1.52           | 1.42           | 1.5            | 4              |
| LN-NR/PVDF-36 | 1.64           | 1.57           | 1.5            | 4              |
| LN-NR/PVDF-67 | 1.57           | 1.51           | 1.53           | 4              |
| LN-NR/PVDF-91 | 1.6            | 1.5            | 1.5            | 4              |

**Table S3.** Equations used in the density functional theory (DFT) calculation, including the equations for the displacement, strain, strain gradient and fitting curve of the polarization of LiNbO<sub>3</sub> nanorods and the calculated flexoelectric coefficients and piezoelectric coefficients.

| Displacement (Å)                    | Strain                     | Strain gradient (Å <sup>-1</sup> )                      | Fitting curve of $P$ (C/m <sup>2</sup> )         | coefficients                                    |
|-------------------------------------|----------------------------|---------------------------------------------------------|--------------------------------------------------|-------------------------------------------------|
| $u_z(x) = A + \cos(0.3x)$           | $S_5 = -0.3A + \sin(0.3x)$ | $\frac{\partial S_5}{\partial x} = -0.09A + \cos(0.3x)$ | $P = eS_5 + \mu \frac{\partial S_5}{\partial x}$ |                                                 |
| $u_z(x, z)$<br>$= 0.5 + \cos(0.3x)$ | $S_5 = -0.15 + \sin(0.3x)$ | $\frac{\partial S_5}{\partial x} = -0.045 \cos(0.3x)$   | $P_x = -0.003 \cos(0.3x)$                        | $\mu_{511} = 0.06$ nC/m                         |
|                                     |                            |                                                         | $P_y$<br>$= -0.005 \sin(0.3x)$                   | $e_{25} = 0.03$ C/m <sup>2</sup><br>$\mu_{512}$ |
|                                     |                            |                                                         | $-0.004 \cos(0.3x)$                              | $= 0.089$ nC/m                                  |
|                                     |                            |                                                         | $P_z = -0.0057 \sin(0.3x)$                       | $e_{35} = 0.038$ C/m <sup>2</sup>               |
